## Mechanisms of Bronchoprotection by Anesthetic Induction Agents

### Propofol versus Ketamine

Robert H. Brown, M.D., M.P.H.,\* Elizabeth M. Wagner, Ph.D.†

**Background:** Propofol and ketamine have been purported to decrease bronchoconstriction during induction of anesthesia and intubation. Whether they act on airway smooth muscle or through neural reflexes has not been determined. We compared propofol and ketamine to attenuate the direct activation of airway smooth muscle by methacholine and limit neurally mediated bronchoconstriction (vagal nerve stimulation).

**Methods:** After approval from the institutional review board, eight sheep were anesthetized with pentobarbital, paralyzed, and ventilated. After left thoracotomy, the bronchial artery was cannulated and perfused. In random order, 5 mg/ml concentrations of propofol, ketamine, and thiopental were infused into the bronchial artery at rates of 0.06, 0.20, and 0.60 ml/min. After 10 min, airway resistance was measured before and after vagal nerve stimulation and methacholine given *via* the bronchial artery. Data were expressed as a percent of baseline response before infusion of drug and analyzed by analysis of variance with significance set at  $P \leq 0.05$ .

**Results:** Systemic blood pressure was not affected by any of the drugs ( $P > 0.46$ ). Baseline airway resistance was not different among the three agents ( $P = 0.56$ ) or by dose ( $P = 0.96$ ). Infusion of propofol and ketamine into the bronchial artery

caused a dose-dependent attenuation of the vagal nerve stimulation-induced bronchoconstriction to  $26 \pm 11\%$  and  $8 \pm 2\%$  of maximum, respectively ( $P < 0.0001$ ). In addition, propofol caused a significant decrease in the methacholine-induced bronchoconstriction to  $43 \pm 27\%$  of maximum at the highest concentration ( $P = 0.05$ ).

**Conclusions:** The local bronchoprotective effects of ketamine and propofol on airways is through neurally mediated mechanisms. Although the direct effects on airway smooth muscle occur at high concentrations, these are unlikely to be of primary clinical relevance. (Key words: Airways; bronchial circulation; methacholine; vagal.)

INDUCTION of anesthesia and intubation of the trachea causes airway constriction. In patients with asthma, tracheal intubation can increase the risk for development of severe bronchospasm. When intubation is required, the use of premedications<sup>1-4</sup> and inhalational anesthetic agents<sup>5-9</sup> may reduce this risk. Moreover, a rapid acting intravenous induction agent is often required to facilitate securing the airway. The most effective induction agent for prevention of bronchospasm in patients with asthma remains controversial, however. Two intravenous induction agents, propofol and ketamine, have been purported to decrease the risk of bronchospasm on induction of anesthesia and intubation. Propofol has been shown to decrease the prevalence of wheezing after induction of anesthesia and intubation of the trachea in normal and asthmatic patients compared with thiopental.<sup>10-12</sup> Likewise, ketamine has been shown to be effective at preventing and actually reversing wheezing in patients with asthma who require anesthesia and intubation.<sup>13,14</sup>

It is generally presumed that the major mechanism of action of ketamine on airways *in vivo* is through indirect actions by prevention of the reuptake of circulating catecholamines, which leads to bronchodilation.<sup>15</sup> *In vitro* data have suggested that ketamine and propofol have direct airway smooth muscle relaxant effects<sup>16-21</sup> and neural effects.<sup>22-26</sup> Whether these mechanisms are

This article is featured in "This Month in Anesthesiology." Please see this issue of ANESTHESIOLOGY, page 7A.

\* Associate Professor, Department of Anesthesiology and Critical Care Medicine and Environmental Health Sciences/Division of Physiology.

† Associate Professor, Department of Medicine/Division of Pulmonary Medicine and Critical Care and Environmental Health Sciences/Division of Physiology.

Received from the Department of Anesthesiology and Critical Care Medicine, the Department of Medicine/Division of Pulmonary Medicine and Critical Care, and Environmental Health Sciences/Division of Physiology. Submitted for publication April 21, 1998. Accepted for publication November 5, 1998. Supported in part by grant HL 10342 from the National Institutes of Health.

Address reprint requests to Dr. Brown: Johns Hopkins School of Public Health, Physiology, Room 7006, 615 North Wolfe Street, Baltimore, Maryland 21205. Address electronic mail to: rbrown@welchlink.welch.jhu.edu



## BRONCHOPROTECTION BY PROPOFOL AND KETAMINE

important *in vivo* have not been determined. Therefore, we undertook the current study to examine the local airway effects of propofol and ketamine on attenuating direct and reflex induced airway constriction. We used a sheep model in which we could administer the anesthetic agents directly to the airways *via* the bronchial artery.

We found that at clinically relevant concentrations, ketamine and propofol diminished vagally induced airway constriction compared with thiopental. Further, propofol also decreased the direct effects of methacholine on airway smooth muscle, but this only occurred at the highest dose administered. Therefore, these data demonstrate that the local bronchoprotective effects of ketamine and propofol on airways is through neurally mediated mechanisms. Although direct effects on airway smooth muscle occur at high concentrations, these effects are unlikely to be of primary clinical relevance.

## Methods

### General

Our study protocol was approved by The Johns Hopkins Animal Care and Use Committee. Anesthesia was induced in eight sheep (25–35 kg) with intramuscularly administered ketamine (30 mg/kg) and subsequently maintained with pentobarbital sodium (20 mg · kg<sup>-1</sup> · h<sup>-1</sup>). A tracheostomy was performed, the sheep were paralyzed with pancuronium bromide (2 mg intravenously, with supplementation during the experiment), and the lungs were mechanically ventilated with room air with supplemental oxygen at a rate of 15 breaths/min and a tidal volume of 12 ml/kg. Five centimeters of H<sub>2</sub>O positive end-expiratory pressure was applied. The left thorax was opened at the fifth intercostal space, and heparin (20,000 U) was administered. The esophageal and thoracic tracheal branches of the bronchoesophageal artery were ligated as previously described.<sup>27</sup> The bronchial branch was then cannulated with an 18-gauge angiocatheter and perfused with a constant flow (0.6 ml · min<sup>-1</sup> · kg<sup>-1</sup>) of autologous blood withdrawn from a femoral artery catheter by a variable-speed pump (Gillson, Villiers-Le-Bel, France). Systemic blood pressure, heart rate, and bronchial arterial pressure were measured continuously throughout the study.

### Airways Resistance

Conducting airways resistance ( $R_{aw}$ ) was measured by forced oscillation.<sup>28</sup> In this method, a gas volume of ≈30

ml is oscillated for 1.5 s at a frequency of 9 Hz after each tidal breath. Airway pressure is measured at a side arm of the tracheal cannula, and a flow signal is obtained from a pneumotachograph positioned between the oscillator and the cannula. Oscillatory signals are analyzed with an on-line computer that measures pressures at points of peak flow. An average resistance is obtained over 8–10 oscillatory cycles. Baseline  $R_{aw}$  measured in this manner in anesthetized sheep typically results in a value of 1.0–2.0 cm H<sub>2</sub>O · l<sup>-1</sup> · s<sup>-1</sup>, which is close to values reported by others.<sup>29,30</sup>

### Airways Reactivity

**Intrabronchial Artery Infusion.** Airways reactivity was determined by measuring  $R_{aw}$  before and after intrabronchial artery infusion of methacholine. Methacholine was delivered through a sideport of the bronchial artery perfusion circuit. From previous experiments, we have confirmed that a plateau in the increase in  $R_{aw}$  is achieved within 2 min of agonist delivery. Sheep received a continuous infusion of methacholine in a concentration of 1–2 μg/ml at 2 ml/min through the bronchial artery, which caused an ≈100% increase in  $R_{aw}$ . With a nominal bronchial artery perfusion rate of 20 ml/min, this delivery rate resulted in calculated molar concentration between  $5 \times 10^{-7}$  M to  $10^{-6}$  M methacholine. After a 2-min delivery, the infusion pump was turned off and the animal allowed to recover to prechallenge level.

**Vagal Nerve Stimulation.** The vagus nerves were isolated, and nerve stimulator electrodes were attached bilaterally (Harvard Apparatus, Holliston, MA). After establishing baseline  $R_{aw}$ , the vagal nerves were simultaneously stimulated bilaterally (30 Hz, 30 ms duration, 40 V, 9 s), which caused bronchoconstriction and a decrease in heart rate. Both of these responses rapidly reversed on cessation of stimulation (<30 s).

### Protocol

The sheep were anesthetized and ventilated as described earlier. After a 30-min recovery period (and 2 h after the intramuscularly administered ketamine), baseline  $R_{aw}$  was measured, and the airways were constricted first by vagal nerve stimulation (VNS) as described while  $R_{aw}$  was measured. After recovery to baseline (2–3 min), methacholine was infused through the bronchial artery and  $R_{aw}$  was measured again. After recovery to baseline (3–5 min), in random order, the three anesthetic agents were infused into the bronchial artery. The concentration for all the drugs was 5 mg/ml, and the infusion rates



were 0.06, 0.20, and 0.60 ml/min. After 10 min of infusion at a each rate, the  $R_{aw}$  was measured prechallenge and during constriction by VNS and infusion of methacholine. After recovery, the next rate was infused and the airway measurements repeated. After the final rate of infusion for a specific drug, the sheep were allowed to recover (30–60 min), baseline measurements were repeated, and the next drug was infused.

### Analysis

The concentration of anesthetic drug in the bronchial circulation was calculated. With a controlled infusion of autologous blood into the bronchial artery at 20 ml/min, and the infusion rates of 0.06, 0.20, and 0.60 ml/min of anesthetic drugs into the perfusate, we calculated the molar concentrations of thiopental to be  $5.6 \times 10^{-5}$  M,  $1.9 \times 10^{-4}$  M, and  $5.6 \times 10^{-4}$  M, respectively. Likewise for propofol, we calculated the molar concentrations to be  $8.4 \times 10^{-5}$  M,  $2.8 \times 10^{-4}$  M, and  $8.4 \times 10^{-4}$  M, respectively. For ketamine, the calculated molar concentrations were  $5.4 \times 10^{-5}$  M,  $1.8 \times 10^{-4}$  M, and  $5.4 \times 10^{-4}$  M, respectively.

Systemic blood pressure was analyzed by one-way analysis of variance. Baseline stimulation (100%) for each sheep for each drug was defined as the change in  $R_{aw}$  with VNS and methacholine before infusion of that specific anesthetic drug into the bronchial artery. The changes in  $R_{aw}$  as a percent of baseline stimulation were analyzed separately for each drug by one-way analysis of variance, with Bonferroni correction for repeated measures within the sheep. The effective dose that caused a 50% decrease in baseline response ( $ED_{50}$ ) was calculated along the linear part of the dose-response curves (first dose to third dose) for ketamine and propofol for the VNS and methacholine challenge each sheep. The means of the  $ED_{50}$  values were compared for each challenge by paired *t* test. Statistical significance was considered to be  $P \leq 0.05$ .

### Results

Baseline systemic blood pressure was  $119 \pm 15/88 \pm 16$  (systolic/diastolic mean  $\pm$  SD) and did not vary significantly during challenges either by drug ( $P = 0.92$ ) or by dose ( $P = 0.38$ ). Baseline  $R_{aw}$  was  $1.95 \pm 0.14$  cm  $H_2O \cdot l^{-1} \cdot s^{-1}$ . Infusion of the three anesthetic agents into the bronchial artery did not significantly alter the baseline  $R_{aw}$  before each challenge either by dose ( $P = 0.88$ ) or by drug ( $P = 0.83$ ) (table 1). Further, before

**Table 1. Baseline  $R_{aw}$  (cm  $H_2O \cdot l^{-1} \cdot s^{-1}$ ) Values (Mean  $\pm$  SD) for Each Anesthetic for Each Dose prior to Challenges**

| Concentration        | $R_{aw}$ (cm $H_2O \cdot l^{-1} \cdot s^{-1}$ ) |
|----------------------|-------------------------------------------------|
| Thiopental           |                                                 |
| 0                    | $1.975 \pm .82$                                 |
| $5.6 \times 10^{-5}$ | $1.957 \pm .91$                                 |
| $1.9 \times 10^{-4}$ | $2.188 \pm .93$                                 |
| $5.6 \times 10^{-4}$ | $2.425 \pm .99$                                 |
| Ketamine             |                                                 |
| 0                    | $1.875 \pm .55$                                 |
| $5.4 \times 10^{-5}$ | $2.050 \pm .71$                                 |
| $1.8 \times 10^{-4}$ | $2.025 \pm .62$                                 |
| $5.4 \times 10^{-4}$ | $2.033 \pm .60$                                 |
| Propofol             |                                                 |
| 0                    | $2.000 \pm .79$                                 |
| $8.4 \times 10^{-5}$ | $2.013 \pm .82$                                 |
| $2.8 \times 10^{-4}$ | $2.175 \pm .88$                                 |
| $8.4 \times 10^{-4}$ | $2.083 \pm .95$                                 |

There was no significant change in prechallenge  $R_{aw}$  with either thiopental ( $P = 0.82$ ), ketamine ( $P = 0.94$ ), or propofol ( $P = 0.97$ ) at any of the concentrations administered.

infusion of anesthetic drug, VNS and methacholine caused a significant increase in  $R_{aw}$  at baseline (maximum response). Vagal nerve stimulation at baseline increased  $R_{aw}$  to  $5.61 \pm 0.53$  cm  $H_2O \cdot l^{-1} \cdot s^{-1}$  (mean  $\pm$  SEM), which was not significantly different among drugs ( $P = 0.93$ ). Methacholine increased  $R_{aw}$  to  $3.46 \pm 0.18$  cm  $H_2O \cdot l^{-1} \cdot s^{-1}$ , which also did not differ among drugs ( $P = 0.59$ ).

Thiopental, at all of the doses administered, did not attenuate  $R_{aw}$  during either VNS or infusion of methacholine. At concentrations of  $5.6 \times 10^{-5}$  M,  $1.9 \times 10^{-4}$  M, and  $5.6 \times 10^{-4}$  M of thiopental, VNS increased  $R_{aw}$  to  $94 \pm 25\%$ ,  $91 \pm 17\%$ , and  $80 \pm 28\%$  of control stimulation, respectively ( $P = 0.92$ ). Similarly, thiopental had no effect on the increase in  $R_{aw}$  with methacholine challenge. Airways resistance increased to  $95 \pm 12\%$ ,  $88 \pm 18\%$ , and  $195 \pm 90\%$ , respectively ( $P = 0.14$ ).

Alternatively, propofol and ketamine had a profound effect on the airway responses to stimulation. Propofol caused a dose-dependent attenuation in the VNS-induced bronchoconstriction. At concentrations of  $8.4 \times 10^{-5}$  M,  $2.8 \times 10^{-4}$  M, and  $8.4 \times 10^{-4}$  M, VNS increased  $R_{aw}$  to only  $83 \pm 5\%$ ,  $50 \pm 5\%$ , and  $26 \pm 11\%$  of maximum (fig. 1,  $P < 0.0001$ ). Further, propofol had an effect on methacholine-induced airway constriction but only at the highest concentration. At the concentrations administered, methacholine increased  $R_{aw}$  to  $124 \pm 19\%$ ,  $96 \pm 14\%$ , and  $43 \pm 27\%$  of maximum (fig. 2,  $P = 0.05$ ).

Ketamine showed the greatest decrease in the airway response to VNS. At concentrations of  $5.4 \times 10^{-5}$  M,



## BRONCHOPROTECTION BY PROPOFOL AND KETAMINE

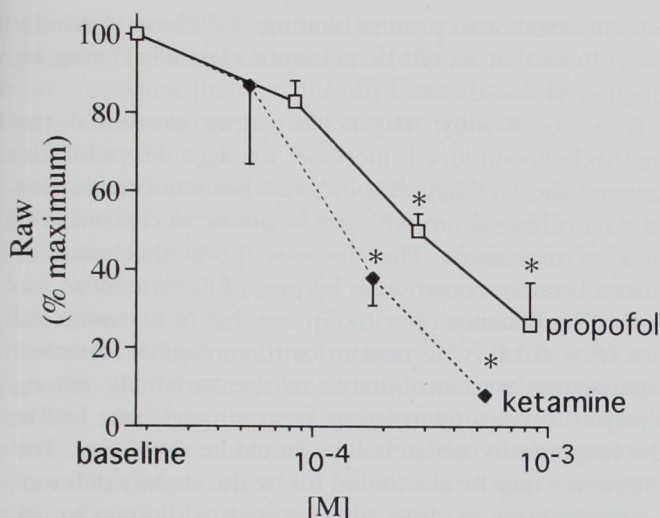

Fig. 1. Raw response to vagal nerve stimulation in eight sheep during increased doses of propofol (squares) and ketamine (diamonds). \* $P < 0.05$  compared with baseline.

$1.8 \times 10^{-4}$  M, and  $5.4 \times 10^{-4}$  M, VNS increased  $R_{aw}$  to only  $87 \pm 19\%$ ,  $38 \pm 7\%$ , and  $8 \pm 2\%$ , respectively (fig. 1,  $P = 0.0004$ ). At the concentrations delivered, methacholine increased  $R_{aw}$  to  $114 \pm 14\%$ ,  $108 \pm 17\%$ , and  $56 \pm 17\%$  of maximum (fig. 2,  $P = 0.14$ ).

For the VNS challenge, the mean  $ED_{50}$  values for ketamine and propofol were  $1.52 \pm 0.58 \times 10^{-4}$  and  $3.54 \pm 0.63 \times 10^{-4}$ , respectively. The  $ED_{50}$  value for ketamine was significantly lower than the  $ED_{50}$  value for propofol during VNS ( $P = 0.03$ ). For the methacholine challenge, the  $ED_{50}$  values for ketamine and propofol were  $7.93 \pm 3.3 \times 10^{-4}$  and  $5.30 \pm 0.88 \times 10^{-4}$ , respectively, which were not significantly different ( $P = 0.38$ ).

## Discussion

Our results show that propofol and ketamine protect against induced airway constriction compared with thiopental. Further, the major mechanism of this bronchoprotection was attenuation of neurally mediated constriction with minimal effects through attenuation of direct airway smooth muscle contraction.

Because the animals needed to be anesthetized during the study, we used a continuous infusion of pentobarbital to maintain anesthesia. We chose pentobarbital because it should not have significant effects on airway reactivity at maintenance doses.<sup>31</sup> In addition, a continuous infusion was used to maintain a constant depth of anesthesia. Because the anesthetic drug challenges were

randomized, any changes in depth of anesthesia over time would also be random and would not have biased our results. Further, beyond an adequate depth of anesthesia, deepening barbiturate anesthesia does not appear to influence airway reactivity or tone.<sup>32,33</sup> The finding that the infusion of thiobarbital in combination with the pentobarbital intravenous anesthetic agent had no effect on either VNS or methacholine-induced airway constriction also supports the lack of effect of the maintenance pentobarbital anesthesia.

We chose concentrations of drug that would be clinically relevant. In a recent study, Ludbrook *et al.*<sup>34</sup> examined the rate of administration of propofol on peak arterial concentrations of propofol. When 100 mg of propofol was administered at 200 mg/min, a peak brain arterial concentration of 30  $\mu$ g/ml was measured, which would correspond to a concentration of  $1.7 \times 10^{-4}$  M, and in the middle of our dose range. Therefore, the doses we used appear to be clinically relevant as measured by doses for induction of anesthesia in sheep.

One of our goals was to study the direct bronchoprotective effects of these anesthetic agents and to eliminate any potential confounding effects that these agents might induce through circulating catecholamines systemically. We continuously measured the blood pressure and heart rate in each animal throughout the study. Because the heart rate was profoundly affected by the VNS challenges, we did not analyze this variable as a measure of systemic catecholamine release. In addition, we believed that any increase in systemic catecholamines from the administration of ketamine would

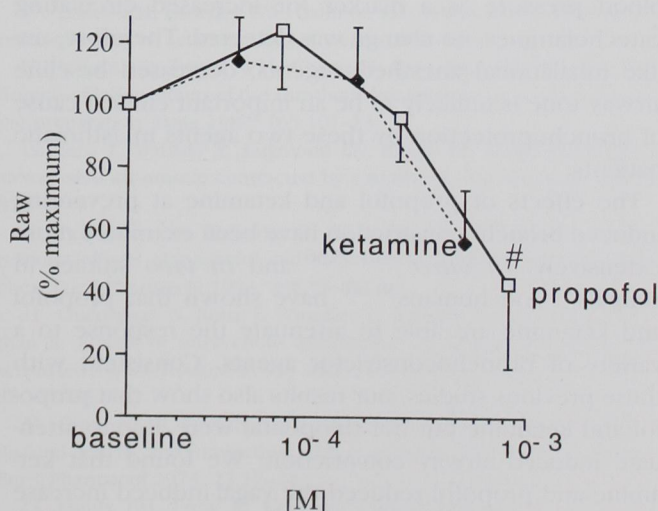

Fig. 2. Raw response to methacholine in eight sheep during increased doses of propofol (squares) and ketamine (diamonds). # $P < 0.05$  compared with baseline.



be detected easily by increased blood pressure, which we measured continuously by an indwelling arterial catheter. We found no significant changes in blood pressure during the infusion of ketamine nor the other two anesthetic agents into the bronchial artery, even at the highest concentrations. This supports our belief of a lack of significant systemic delivery of the anesthetic agents that were infused into the bronchial artery. Therefore, the decrease in airway responses we observed were local to the airways and not attributable to changes in circulating catecholamines or systemic changes.

Although the effects of inhalational anesthetic agents on baseline airway tone have been demonstrated clearly to cause relaxation,<sup>8</sup> the effects of intravenous agents such as propofol and ketamine are inconclusive. Several investigators have reported relaxant effects of ketamine and propofol on airway tone *in vitro*,<sup>17,20</sup> and others have reported no effect of these drugs on smooth muscle tone.<sup>18,35</sup> In an older clinical study reported by Huber *et al.*,<sup>14</sup> intravenously administered ketamine caused a dose-dependent decrease in  $R_{aw}$  in healthy subjects and in those with acute and chronic reactive airways disease. These patients were intubated, however, which would have increased  $R_{aw}$ . Further, prevention of reuptake of circulating catecholamines from the intravenous administration of ketamine<sup>15</sup> is the most likely explanation of the observed decrease in  $R_{aw}$  with increasing ketamine doses.<sup>23,25</sup> Our results do not support an effect of these drugs on baseline airway tone. We observed no decrease in baseline tone even at the highest concentration delivered directly to the airways. Further, using systemic blood pressure as a marker for increased circulating catecholamines, no change was detected. Therefore, unlike inhalational anesthetic agents, decreased baseline airway tone is unlikely to be an important clinical cause of bronchoprotection by these two agents in asthmatic patients.

The effects of propofol and ketamine at preventing induced bronchoconstriction have been examined more extensively. *In vitro*<sup>16-21,35,36</sup> and *in vivo* studies in animals<sup>37</sup> and humans<sup>38-40</sup> have shown that propofol and ketamine are able to attenuate the response to a variety of bronchoconstrictor agents. Consistent with these previous studies, our results also show that propofol and ketamine but not thiopental were able to attenuate induced airway constriction. We found that ketamine and propofol reduced the vagal-induced increase in  $R_{aw}$  in a dose-dependent fashion. Although we did not observe complete prevention of the vagal-induced increase in  $R_{aw}$ , this may be attributable to the doses

administered or to protein binding. We chose to administer doses that would be achieved clinically during induction of anesthesia.<sup>41-43</sup>

It is noteworthy that neither drug prevented the methacholine-induced increase in  $R_{aw}$ . Propofol decreased the methacholine-induced bronchoconstriction to 43% of maximum whereas ketamine decreased it to 56% of maximum. The decrease in methacholine-induced bronchoconstriction by propofol did achieve statistical significance ( $P = 0.05$ ), but that of ketamine did not ( $P = 0.14$ ). One reason for this marginal statistical significance was attributable to the variability among sheep. Clearly, a decrease to approximately one half in the response to methacholine should be significant. The difference may be accounted for by the slightly different concentrations of drug administered. Although we infused the ketamine and propofol at the same rate, the difference in molecular weight led to a slightly higher molar concentration of propofol to be administered compared with ketamine. Whether reaching statistical significance at the highest dose we infused or at higher doses has clinical relevance remains in doubt, however. It is clear that at the lower doses we administered that are clinically relevant, the major effect of these drugs was on neural responses.

Consistent with our findings, several investigators have examined the mechanisms for neural depression by ketamine and propofol. Shrivastav<sup>26</sup> showed that ketamine, applied externally to giant squid axon, depolarized the nerve in a concentration-dependent fashion, reduced inward peak transient currents, and reduced steady-state current. Cronnelly *et al.*<sup>22</sup> demonstrated that ketamine affected the amplitude but not the frequency of miniature end-plate potentials of frog sartorius muscle.

Further, McGrath *et al.*<sup>24</sup> showed that ketamine depressed preganglionic sympathetic discharge in a dose-related fashion in rabbits. The results from Lundy and Frew<sup>23</sup> and Nedergaard<sup>25</sup> suggested that ketamine affected neural transmission by blocking extraneuronal uptake of catecholamines through inhibition of a neuronal membrane pump, which transports norepinephrine into the adrenergic neurones. Biddle *et al.*<sup>44</sup> examined the effects of propofol on the neural responses in a rat artery smooth muscle preparation. They found that propofol attenuated the response to exogenous norepinephrine and the response to endogenous norepinephrine release from nerve terminals induced by electrical field stimulation. Any direct effect of the drugs on smooth muscle, however, would also inhibit a neurally mediated bronchoconstriction. Our findings are consis-



## BRONCHOPROTECTION BY PROPOFOL AND KETAMINE

tent with the ability of these drugs to diminish neural responses through prejunctional effects. It was somewhat surprising that we did not observe a decrease in baseline tone; however, this may be related to the resting tone in the sheep.

That the primary mechanism of propofol and ketamine inhibition of bronchoconstriction is through neural mechanisms is also consistent with clinical investigations. Ketamine and propofol have been shown to protect against bronchoconstriction on induction of anesthesia and intubation of the trachea.<sup>10-12</sup> The increase in  $R_{aw}$  with airway manipulation such as bronchoscopy or tracheal intubation is mediated through neural mechanisms, which can also be blocked by the administration of local anesthetic agents.<sup>45</sup> Whether the exact mechanism of neural depression by propofol and ketamine is the same as that of local anesthetic agents remains to be determined.

Finally, whether propofol and ketamine are effective at reversing bronchoconstriction is currently not clear. There is some anecdotal evidence that propofol<sup>40,46</sup> and ketamine<sup>13</sup> can reverse bronchoconstriction. When bronchoconstriction was induced in healthy subjects with ultrasonic aerosols, however, inhaled halothane but not intravenously administered ketamine reversed the increased  $R_{aw}$ .<sup>47</sup> Unfortunately, our study was not designed to address this question.

Propofol and ketamine attenuate induced bronchoconstriction. Both have local effects on the airways, with their major mechanism of bronchoprotection occurring through depression of neurally induced bronchoconstriction. In addition, these drugs depress direct airway smooth muscle activation, but this appears to be less important at clinically relevant concentrations. Furthermore, ketamine is more potent than propofol at preventing neurally induced bronchoconstriction.

## References

1. Wu SC, Hildebrandt J, Isner PD, Pierson DJ, Bishop MJ: Efficacy of anticholinergic and  $\beta$ -adrenergic agonist treatment of maximal cholinergic bronchospasm in tracheally intubated rabbits. *Anesth Analg* 1992; 75:777-83
2. Kil HK, Rooke GA, Ryan-Dykes MA, Bishop MJ: Effect of prophylactic bronchodilator treatment on lung resistance after tracheal intubation. *ANESTHESIOLOGY* 1994; 81:43-8
3. Groeben H, Foster WM, Brown RH: Intravenous lidocaine and oral mexiletine block reflex bronchoconstriction in asthmatic subjects. *Am J Respir Crit Care Med* 1996; 154:885-8
4. Groeben H, Brown RH: Ipratropium decreases airway size by preferential M2 muscarinic receptor blockade. *ANESTHESIOLOGY* 1996; 85:867-73
5. Vettermann J, Beck KC, Lindahl SHE, Brichant JF, Rehder K: Actions of enflurane, isoflurane, vecuronium, atracurium and pancuronium on pulmonary resistance in dogs. *ANESTHESIOLOGY* 1988; 69:688-95
6. Hirshman CA, Edelstein G, Peetz S, Wayne R, Downes H: Mechanism of action of inhalational anesthesia on airways. *ANESTHESIOLOGY* 1982; 56:107-11
7. Alexander CM, Chen L, Ray R, Marshall BE: The influence of halothane and isoflurane on pulmonary collateral ventilation. *ANESTHESIOLOGY* 1985; 62:135-40
8. Brown RH, Mitzner W, Zerhouni E, Hirshman CA: Direct *in vivo* visualization of bronchodilation induced by inhalational anesthesia using high resolution computed tomography (HRCT). *ANESTHESIOLOGY* 1993; 78:295-300
9. Brown RH, Zerhouni EA, Hirshman CA: Comparison of low concentrations of halothane and isoflurane as bronchodilators. *ANESTHESIOLOGY* 1993; 78:1097-101
10. Pizov R, Brown RH, Weiss YS, Baranov D, Hennes H, Baker S, Hirshman CA: Wheezing during induction of general anesthesia in patients with and without asthma: A randomized blinded trial. *ANESTHESIOLOGY* 1995; 82:1111-6
11. Eames WO, Rooke A, Wu R, Bishop MJ: Comparison of the effects of etomidate, propofol, and thiopental on respiratory resistance after tracheal intubation. *ANESTHESIOLOGY* 1996; 84:1307-11
12. Wu RSC, Wu KC, Sum DCW, Bishop MJ: Comparative effects of thiopentone and propofol on respiratory resistance after tracheal intubation. *Br J Anaesth* 1996; 77:735-8
13. Corssen G, Gutierrez J, Reves JC, Huber FC: Ketamine in the anesthetic management of asthmatic patients. *Anesth Analg* 1972; 51:588-96
14. Huber FC, Reeves JG, Gutierrez J, Corssen G: Ketamine: Its effect on airway resistance in man. *South Med J* 1972; 65:1176-80
15. Baraka A, Harrison T, Kachachi T: Catecholamine levels after ketamine anesthesia in man. *Anesth Analg* 1973; 52:198-200
16. Cheng EY, Mazzeo AJ, Bosnjak ZJ, Coon RL, Kampine JP: Direct relaxant effects of intravenous anesthetics on airway smooth muscle. *Anesth Analg* 1996; 83:162-8
17. Lundy PM, Gowdey CW, Calhoun EH: Tracheal smooth muscle relaxant effect of ketamine. *Br J Anaesth* 1974; 46:333-6
18. Vitkun SA, Foster WM, Chang H, Bergofsky EH, Poppers PJ: Bronchodilating effects of the anesthetic ketamine in an *in vitro* guinea pig preparation. *Lung* 1987; 165:101-13
19. Sato T, Matsuki A, Zsigmond EK, Rabito SF: Ketamine relaxes airway smooth muscle contracted by endothelin. *Anesth Analg* 1997; 84:900-6
20. Pedersen CM, Thirstrup S, Nielsen-Kudst JE: Smooth muscle relaxant effects of propofol and ketamine in isolated guinea-pig trachea. *Eur J Pharmacol* 1993; 238:75-80
21. Ouedraogo N, Roux E, Forestier F, Rossetti M, Savineau J, Marthan R: Effects of intravenous anesthetics on normal and passively sensitized human isolated airway smooth muscle. *ANESTHESIOLOGY* 1998; 88:317-26
22. Cronnelly R, Dretchen KL, Sokoll MD, Long JP: Ketamine: Myoneural activity and interaction with neuromuscular blocking agents. *Eur J Pharmacol* 1973; 22:17-22
23. Lundy PM, Frew R: Ketamine potentiates catecholamine responses of vascular smooth muscle by inhibition of extraneuronal uptake. *Can J Physiol Pharmacol* 1981; 59:520-7
24. McGrath JC, Mackenzie JE, Miller RA: Effects of ketamine on the



central sympathetic discharge and the baroreceptor reflex during mechanical ventilation. *Br J Anaesth* 1975; 47:1141-7

25. Nedergaard OA: Cocaine-like effect of ketamine on vascular adrenergic neurones. *Eur J Pharmacol* 1973; 23:153-61

26. Shrivastav BB: Mechanism of ketamine block of nerve conduction. *J Pharmacol Exp Ther* 1977; 201:162-70

27. Wagner EM, Mitzner W, Bleecker ER: Effects of airway pressure on bronchial blood flow. *J Appl Physiol* 1987; 62:561-6

28. Goldman M, Knudson RJ, Mead J, Peterson N, Schwaber JR, Wohl ME: A simplified measurement of respiratory resistance by forced oscillation. *J Appl Physiol* 1970; 28:113-6

29. Long WM, Yerger LD, Abraham WM, Lobel C: Late-phase bronchial vascular responses in allergic sheep. *J Appl Physiol* 1990; 69:584-90

30. Mariassy AT, Gazeroglu H, Wanner A: Morphometry of the subepithelial circulation in sheep airways, effects of vascular congestion. *Am Rev Respir Dis* 1991; 143:162-6

31. Curry C, Lenox WC, Spannhake EW, Hirshman CA: Contractile responses of guinea pig trachea to oxybarbiturates and thiobarbiturates. *ANESTHESIOLOGY* 1991; 75:679-83

32. Steinhaus JE, Gaskin L: A study of intravenous lidocaine as a suppressant of cough reflex. *ANESTHESIOLOGY* 1963; 24:285-90

33. Brown RH, Zerhouni EA, Mitzner W: Variability in the size of individual airways over the course of one year. *Am J Respir Crit Care Med* 1995; 151:1159-64

34. Ludbrook GL, Upton RN, Grant C, Martinez A: The effect of rate on administration on brain concentrations of propofol in sheep. *Anesth Analg* 1998; 86:1301-6

35. Gateau O, Bourgain J-L, Gaudy J-H, Benveniste J: Effects of ketamine on isolated human bronchial preparations. *Br J Anaesth* 1989; 63:692-5

36. Wana HT, Gergis SD: Procaine, lidocaine, and ketamine inhibit histamine-induced contracture of guinea pig tracheal muscle *in vitro*. *Anesth Analg* 1978; 47:25-7

37. Hirshman CA, Downes H, Farbood A, Bergman NA: Ketamine block of bronchospasm in experimental canine asthma. *Br J Anaesth* 1979; 51:713-8

38. Olwoch IP, Brandt HD, du Plooy WJ: Effect of aerosolized ketamine on histamine-induced bronchospasm in healthy volunteers. *Med Sci Res* 1993; 21:831-2

39. Olwoch IP, Brandt HD, du Plooy WJ: Aerosolized ketamine prevents histamine-induced bronchospasm. *Med Sci Res* 1994; 22:257-8

40. Conti G, Utri DD, Vilardi V, De Blasi RA, Pelaia P, Bufi M, Rosa G, Gaspareto G: Propofol induces bronchodilation in mechanically ventilated chronic obstructive pulmonary disease (COPD) patients. *Acta Anaesthesiol Scand* 1993; 37:105-9

41. Burch PG, Stanski DR: The role of metabolism and protein binding in thiopental anesthesia. *ANESTHESIOLOGY* 1983; 58:146-52

42. Idvall J, Ahlgren I, Aronsen KF, Stenberg P: Ketamine infusions: Pharmacokinetics and clinical effects. *Br J Anaesth* 1979; 51:1167-73

43. Servin F, Desmonts JM, Haberer JP, Cockshott ID, Plummer GF, Farinotti R: Pharmacokinetics and protein binding of propofol in patients with cirrhosis. *ANESTHESIOLOGY* 1988; 69:887-91

44. Biddle NL, Gelb AW, Hamilton JT: Propofol differentially attenuates the responses to exogenous and endogenous norepinephrine in the isolated rat femoral artery *in vitro*. *Anesth Analg* 1995; 80:793-9

45. Foster WM, Hurewitz AN: Aerosolized lidocaine reduces dose of topical anesthetic for bronchoscopy. *Am Rev Respir Dis* 1992; 146:520-2

46. Pedersen CM: The effect of sedation with propofol on postoperative bronchoconstriction in patients with hyperreactive airway disease. *Int Care Med* 1992; 18:45-6

47. Waltemath CL, Bergman NA: Effects of ketamine and halothane on increased respiratory resistance provoked by ultrasonic aerosols. *ANESTHESIOLOGY* 1974; 41:473-6
